# Supplementary material for: Alcohol and Tobacco Use in Relation to Mammographic Density in 23,456 Women
Source: Oxford University Press journal article supplement (doi:10.1158/1055-9965.epi-19-0348), 2020-02-17
Supplement: 10559965epi190348-sup-219893_4_supp_6034831_q4dss3.xlsx [file 10559965epi190348-sup-219893_4_supp_6034831_q4dss3.xlsx]

## Sheet: Table List
Supplementary Tables
Supplementary Table 1. Association of alcohol and tobacco use with mammographic density phenotypes, by BMI category.
Supplementary Table 2. Association of alcohol and tobacco use with mammographic density phenotypes, by menopausal status.
Supplementary Table 3. Association of alcohol and tobacco use with mammographic density phenotypes in post-menopausal women, by menopausal hormone therapy (MHT) use.
Supplementary Table 4. Association of smoking status, intensity, and duration with mammographic density phenotypes.
Supplementary Table 5. Association of alcohol and tobacco use with mammographic density phenotypes among premenopausal women, by BMI.
Supplementary Table 6. Association of alcohol and tobacco use with mammographic density phenotypes among postmenopausal women, by BMI.
Supplementary Table 7. Sensitivity analyses of the association of alcohol and tobacco use with mammographic density phenotypes.
Supplementary Table 8. Individual and mutually adjusted models of the association of alcohol and tobacco with mammographic density phenotypes.
Supplementary Table 9. Combined effects of alcohol and tobacco use on mammographic density phenotypes.

## Sheet: Table S1
Supplementary Table 1. Association of alcohol and tobacco use with mammographic density phenotypes, by BMI category.
			Percent Density (%)		√Percent Density			Dense Area (cm2)		√Dense Area			Nondense Area (cm2)		√Nondense Area
	N	%	β	se	β	SE	p	β	se	β	SE	p	β	se	β	SE	p
Normal (18.5-24.9 kg/m2)	9136	0.394388
Alcohol use
None	2873	0.31447	Referent					Referent					Referent
1-4 DPW	2913	0.318849	0.0708	0.8159	0.0077	0.0887	0.9309	-0.3675	1.0493	-0.0348	0.0997	0.7268	-2.1695	1.1484	-0.0937	0.0498	0.0597
5+ DPW	3350	0.366681	0.5109	0.4953	0.0553	0.0533	0.2995	-0.1766	1.1269	-0.0167	0.1067	0.876	-2.4161	1.1174	-0.1044	0.0485	0.0312
p for trend							0.14					0.9645					0.0427
Tobacco use
Never	5803	0.63518	Referent					Referent					Referent
<½ PPD	1269	0.138901	0.1232	0.7294	0.0134	0.0792	0.8662	1.3855	0.9236	0.1292	0.0851	0.1289	3.7617	1.3929	0.1607	0.0591	0.0066
½ - 1 PPD	1312	0.143608	-0.3065	0.3601	-0.0335	0.0395	0.3964	0.7776	0.6723	0.0729	0.0626	0.2442	3.1707	1.3735	0.1356	0.0584	0.0202
1+ PPD	752	0.0823117	-0.7823	0.4523	-0.086	0.0502	0.0864	0.4126	0.5752	0.0388	0.0539	0.4721	5.3405	1.7587	0.2275	0.0742	0.0022
p for trend							0.1274					0.1314					0.0015
Overweight (25-29.9 kg/m2)	7513	0.324325
Alcohol use
None	2893	0.385066	Referent					Referent					Referent
1-4 DPW	2356	0.31359	0.444	0.3331	0.0481	0.0359	0.1801	0.3283	0.4689	0.0309	0.044	0.482	-3.7719	2.205	-0.1634	0.0962	0.0894
5+ DPW	2264	0.301344	0.7121	0.3445	0.0769	0.0369	0.0368	0.3273	0.4816	0.0308	0.0452	0.4956	-6.3832	1.9855	-0.2779	0.0875	0.0015
p for trend							0.0409					0.5188					<0.0001
Tobacco use
Never	4468	0.594703	Referent					Referent					Referent
<½ PPD	958	0.127512	-0.6053	0.6878	-0.0664	0.076	0.3821	-0.3053	0.5974	-0.0289	0.0567	0.6102	2.9098	1.7364	0.1245	0.0739	0.0918
½ - 1 PPD	1198	0.159457	-1.5038	0.6442	-0.1668	0.0728	0.0219	-1.0816	0.5402	-0.1031	0.052	0.0475	6.7401	3.4515	0.2864	0.1449	0.048
1+ PPD	889	0.118328	-1.1036	0.43	-0.1218	0.0481	0.0112	-0.6132	0.6172	-0.0582	0.0589	0.3226	4.1485	4.4819	0.1771	0.1899	0.3508
p for trend							0.0003					0.0767					<0.0001
Obese (≥30 kg/m2)	6516	0.281286
Alcohol use
None	3538	0.542971	Referent					Referent					Referent
1-4 DPW	1886	0.289441	-0.3557	0.4416	-0.0389	0.0485	0.4224	-0.6342	0.5111	-0.0602	0.0488	0.2167	1.291	3.5878	0.0554	0.1536	0.7184
5+ DPW	1092	0.167587	0.4264	0.8969	0.0462	0.0967	0.633	0.2017	1.0026	0.019	0.0943	0.8407	-2.6326	3.644	-0.1138	0.1583	0.4723
p for trend							0.9687					0.7443					0.4198
Tobacco use
Never	3794	0.582259	Referent					Referent					Referent
<½ PPD	668	0.102517	1.0391	0.4647	0.1118	0.0494	0.0236	1.2511	0.7688	0.1168	0.071	0.1001	-4.2116	2.1647	-0.1826	0.0946	0.0535
½ - 1 PPD	1029	0.157919	0.6141	0.3866	0.0664	0.0415	0.1096	0.6896	0.5566	0.0647	0.0519	0.2127	-2.2825	1.8325	-0.0986	0.0795	0.2149
1+ PPD	1025	0.157305	-0.7002	0.8018	-0.0769	0.0888	0.386	-0.5891	0.9162	-0.0559	0.0874	0.5228	2.8323	3.709	0.1212	0.1579	0.4429
p for trend							0.8455					0.9811					0.6893
Interaction tests
Alcohol × BMI categories							0.0391					0.1959					0.0206
Tobacco × BMI categories							0.0017					0.0176					<0.0001
Linear regression models of the square-root transformed mammographic density phenotypes were adjusted for: age, age2, BMI, BMI2, BMI3, late adolescent BMI, age at menarche, age at first birth, parity, menopausal status, menopausal hormone therapy use, first-degree relative with breast cancer, physical activity, and image batch. Effects were estimated separately in the Hologic and GE cohorts, and …

## Sheet: Table S2
Supplementary Table 2. Association of alcohol and tobacco use with mammographic density phenotypes, by menopausal status.
			Percent Density (%)		√Percent Density			Dense Area (cm2)		√Dense Area			Nondense Area (cm2)		√Nondense Area
	N	%	β	se	β	SE	p	β	se	β	SE	p	β	se	β	SE	p
Premenopausal	5707	24.3
Alcohol use
None	2263	39.7	Referent					Referent					Referent
1-4 DPW	2005	35.1	0.7765	0.359	0.0838	0.0384	0.029	0.5836	0.5191	0.0548	0.0485	0.2586	-2.1949	1.4342	-0.0948	0.0622	0.1279
5+ DPW	1439	25.2	0.6701	0.4001	0.0724	0.0429	0.0911	0.355	0.5778	0.0334	0.0542	0.5381	-3.2258	1.5917	-0.1396	0.0693	0.0439
p for trend							0.0608					0.4626					0.0012
Tobacco use
Never	4114	72.1	Referent					Referent					Referent
<½ PPD	559	9.8	-0.3056	0.5123	-0.0334	0.0562	0.5526	0.2964	0.7562	0.0279	0.071	0.6949	2.1543	2.1229	0.0923	0.0906	0.3084
½ - 1 PPD	669	11.7	-0.6731	0.4707	-0.0739	0.0521	0.1564	0.5525	0.705	0.0519	0.0659	0.431	5.7699	1.9964	0.2456	0.0841	0.0035
1+ PPD	365	6.4	-0.6361	0.85	-0.0698	0.094	0.4579	0.4766	1.4124	0.0448	0.1322	0.7344	4.9616	2.6227	0.2115	0.1108	0.0564
p for trend							0.2222					0.8068					<0.0001
Postmenopausal	17749	75.7
Alcohol use
None	7150	40.3	Referent					Referent					Referent
1-4 DPW	5233	29.5	-0.3684	0.1302	-0.0403	0.0143	0.5658	-0.9027	0.9307	-0.0859	0.0893	0.3361	-1.8164	0.8774	-0.0784	0.038	0.0393
5+ DPW	5366	30.2	0.4023	0.2215	0.0436	0.0239	0.0676	0.1432	0.4344	0.0135	0.0409	0.7417	-3.6711	1.6945	-0.159	0.0739	0.0315
p for trend							0.0576					0.6459					0.0162
Tobacco use
Never	10119	57.1	Referent					Referent					Referent
<½ PPD	2384	13.4	0.0836	0.2659	0.0091	0.0289	0.753	0.7272	0.3724	0.0682	0.0347	0.0497	1.555	1.1059	0.0667	0.0473	0.1591
½ - 1 PPD	2918	16.4	-0.4103	0.2437	-0.0449	0.0268	0.0941	-0.0731	0.3735	-0.0069	0.0353	0.8462	1.8943	1.023	0.0812	0.0437	0.0631
1+ PPD	2328	13.1	-0.839	0.2654	-0.0923	0.0295	0.0018	-0.3875	0.3724	-0.0367	0.0354	0.3007	4.3279	1.136	0.1847	0.0481	0.0001
p for trend							0.0018					0.4607					<0.0001
Interaction tests
Alcohol × menopausal status							0.0162					0.3589					0.3231
Tobacco × menopausal status							0.5017					0.6157					0.2423
Linear regression models of the square-root transformed mammographic density phenotypes were adjusted for: age, age2, BMI, BMI2, BMI3, late adolescent BMI, age at menarche, age at first birth, parity, menopausal status, menopausal hormone therapy use, first-degree relative with breast cancer, physical activity, and image batch. Effects were estimated separately in the Hologic and GE cohorts, and …

## Sheet: Table S3
Supplementary Table 3. Association of alcohol and tobacco use with mammographic density phenotypes in post-menopausal women, by menopausal hormone therapy (MHT) use.
			Percent Density (%)		√Percent Density			Dense Area (cm2)		√Dense Area			Nondense Area (cm2)		√Nondense Area
	N	%	β	se	β	SE	p	β	se	β	SE	p	β	se	β	SE	p
No MHT use	11947	69.2
Alcohol use
None	4867	40.7	Referent					Referent					Referent
1-4 DPW	3444	28.8	0.0597	0.2731	0.0065	0.0297	0.8268	-0.2484	0.4103	-0.0235	0.0389	0.5448	-1.7356	1.0879	-0.0749	0.0471	0.1122
5+ DPW	3636	30.4	0.4106	0.267	0.0445	0.0288	0.1218	0.3358	0.3645	0.0316	0.0342	0.3555	-3.9415	2.444	-0.1708	0.1067	0.1093
p for trend							0.0854					0.2833					0.0844
Tobacco use
Never	6783	56.8	Referent					Referent					Referent
<½ PPD	1596	13.4	0.2191	0.3231	0.0238	0.035	0.4968	0.8658	0.4475	0.0811	0.0416	0.0515	1.0505	1.3676	0.0451	0.0586	0.4414
½ - 1 PPD	1965	16.4	-0.0651	0.4887	-0.0071	0.0533	0.8946	0.0848	0.4096	0.008	0.0386	0.8358	1.2956	1.2637	0.0556	0.0541	0.3041
1+ PPD	1603	13.4	-1.0016	0.3164	-0.1104	0.0353	0.0018	-0.587	0.4403	-0.0557	0.042	0.185	3.3966	2.7374	0.1452	0.1163	0.2119
p for trend							0.1233					0.4371					0.1801
MHT use	5802	30.8
Alcohol use
None	2283	39.4	Referent					Referent					Referent
1-4 DPW	1789	30.8	-0.5736	0.8803	-0.0629	0.0972	0.5174	-1.2528	1.3234	-0.1196	0.1278	0.3495	-1.4097	2.1599	-0.0608	0.0934	0.5155
5+ DPW	1730	29.8	0.3874	0.3994	0.042	0.0431	0.3309	-0.318	1.0028	-0.0301	0.0952	0.7516	-3.4646	1.5421	-0.15	0.0672	0.0257
p for trend							0.3768					0.731					0.0282
Tobacco use
Never	3336	57.5	Referent					Referent					Referent
<½ PPD	788	13.6	-0.186	0.4708	-0.0203	0.0515	0.6934	0.4147	0.6756	0.039	0.0633	0.5377	2.4614	1.8931	0.1054	0.0807	0.1918
½ - 1 PPD	953	16.4	-0.8777	0.4315	-0.0966	0.048	0.0441	-0.5178	0.6182	-0.0491	0.0589	0.4048	3.6556	2.3513	0.1562	0.0998	0.1176
1+ PPD	725	12.5	-0.4048	0.492	-0.0443	0.0541	0.4129	0.139	0.7052	0.0131	0.0664	0.844	3.6321	1.9836	0.1552	0.0842	0.0654
p for trend							0.1151					0.8697					0.0477
Interaction tests
Alcohol × MHT use							0.7018					0.8613					0.7708
Tobacco × MHT use							0.4153					0.2597					0.9567
Linear regression models of the square-root transformed mammographic density phenotypes were adjusted for: age, age2, BMI, BMI2, BMI3, late adolescent BMI, age at menarche, age at first birth, parity, menopausal status, menopausal hormone therapy use, first-degree relative with breast cancer, physical activity, and image batch. Effects were estimated separately in the Hologic and GE cohorts, and …

## Sheet: Table S4
Supplementary Table 4. Association of smoking status, intensity, and duration with mammographic density phenotypes.
			Percent Density (%)		√Percent Density			Dense Area (cm2)		√Dense Area			Nondense Area (cm2)		√Nondense Area
	N	%	β	se	β	SE	p	β	se	β	SE	p	β	se	β	SE	p
Smoking status
Never	14233	60.7	Referent		Referent			Referent					Referent
Former	8304	35.4	-0.239	0.1634	-0.0261	0.0179	0.1451	0.3177	0.2333	0.0299	0.0219	0.1728	2.3981	0.6848	0.1027	0.0292	0.0004
Current	919	3.8	-1.314	0.3868	-0.1454	0.0435	0.0008	-0.6006	0.5576	-0.057	0.0532	0.2834	5.3524	1.6806	0.228	0.0709	0.0013
Status and intensity
Never	14233	60.7	Referent		Referent			Referent					Referent
Former, <½ PPD	2575	11	0.2496	0.2808	0.0271	0.0304	0.3734	0.9627	0.3588	0.0901	0.0333	0.0069	1.2232	1.0392	0.0525	0.0445	0.2385
Former, ½ - 1 PPD	3216	13.7	-0.3948	0.2274	-0.0432	0.025	0.0834	0.0519	0.3234	0.0049	0.0305	0.8718	2.4403	0.9547	0.1045	0.0407	0.0094
Former, 1+ PPD	2513	10.7	-0.5365	0.2529	-0.0588	0.0279	0.035	-0.2653	0.6632	-0.0251	0.0629	0.6907	3.6015	1.067	0.1539	0.0453	0.0007
Current, <½ PPD	368	1.6	-1.5922	0.9827	-0.1768	0.1113	0.1122	-0.6907	0.859	-0.0656	0.0821	0.4244	6.402	4.6061	0.2722	0.1936	0.1522
Current, ½ - 1 PPD	371	1.6	-0.7372	0.8975	-0.081	0.0995	0.4155	0.498	0.8764	0.0468	0.082	0.5677	5.9123	6.1823	0.2516	0.2603	0.3358
Current, 1+ PPD	180	0.8	-1.9132	2.1023	-0.2133	0.2401	0.3741	-2.6537	1.1714	-0.2567	0.1162	0.0272	3.0955	13.5336	0.1324	0.5756	0.8181
Total duration
Never	14233	60.7	Referent		Referent			Referent					Referent
<1 year	356	1.5	0.2514	0.6226	0.0273	0.0674	0.6859	0.4179	0.8795	0.0393	0.0824	0.6337	-1.1437	2.551	-0.0493	0.1102	0.6543
1 to 5 years	1975	8.4	0.2958	0.2811	0.0321	0.0304	0.2905	1.4767	0.8663	0.1376	0.0797	0.0844	1.1976	1.1582	0.0514	0.0496	0.2996
6 to 10 years	1650	7	-0.4403	0.2989	-0.0482	0.0329	0.143	0.1358	0.4269	0.0128	0.0402	0.7506	3.1213	1.2604	0.1335	0.0536	0.0128
11 to 15 years	1375	5.9	-0.4103	0.3255	-0.0449	0.0358	0.2107	0.5429	0.4685	0.051	0.0438	0.2441	5.1652	2.0016	0.2201	0.0845	0.0092
16+ years	3816	16.3	-0.7535	0.2146	-0.0828	0.0238	0.0005	-0.6949	0.6591	-0.066	0.063	0.295	3.1872	0.9126	0.1363	0.0388	0.0004
Linear regression models of the square-root transformed mammographic density phenotypes were adjusted for: alcohol use, age, age2, BMI, BMI2, BMI3, late adolescent BMI, age at menarche, age at first birth, parity, menopausal status, menopausal hormone therapy use, first-degree relative with breast cancer, physical activity, and image batch. Effects were estimated separately in the Hologic and GE …

## Sheet: Table S5
Supplementary Table 5. Association of alcohol and tobacco use with mammographic density phenotypes among premenopausal women, by BMI.
			Percent Density (%)		√Percent Density			Dense Area (cm2)		√Dense Area			Nondense Area (cm2)		√Nondense Area
	N	%	β	se	β	SE	p	β	se	β	SE	p	β	se	β	SE	p
Normal (18.5-24.9 kg/m2)	2489
Alcohol use
None	819	32.9	Referent					Referent					Referent
1-4 DPW	941	70.7	1.6014	0.5448	0.1712	0.0572	0.0028	1.3247	0.6949	0.1236	0.0641	0.0538	-4.9748	1.9712	-0.216	0.0864	0.0124
5+ DPW	729	29.3	1.0702	0.5817	0.1151	0.0618	0.0624	0.419	0.967	0.0394	0.0906	0.6638	-4.2322	2.1279	-0.1835	0.093	0.0486
p for trend							0.0589					0.6142					0.0565
Tobacco use
Never	1904	76.5	Referent					Referent					Referent
< 1/2 PPD	243	9.8	-0.9199	0.7408	-0.1013	0.0825	0.2197	0.4948	0.9875	0.0465	0.0924	0.6152	7.372	2.9555	0.3129	0.1238	0.0115
1/2 - 1 PPD	246	9.9	0.0266	1.1329	0.0029	0.1233	0.9815	3.2157	2.785	0.2953	0.249	0.2356	6.6329	2.9502	0.2819	0.1239	0.0229
1+ PPD	96	3.9	-0.3712	1.1513	-0.0406	0.1265	0.7485	0.4051	1.5109	0.0381	0.1416	0.7881	3.3236	4.4616	0.1421	0.1896	0.4534
p for trend							0.3849					0.1839					0.0093
Overweight (25-29.9 kg/m2)	1661
Alcohol use
None	647	39	Referent					Referent					Referent
1-4 DPW	566	34.1	1.3497	0.7142	0.1447	0.0754	0.055	1.2056	0.9965	0.1126	0.0921	0.2215	-6.4036	2.7659	-0.2788	0.1219	0.0222
5+ DPW	448	27	0.9818	0.7619	0.1057	0.0811	0.1923	0.2474	1.0545	0.0233	0.0991	0.8145	-7.0201	2.9607	-0.306	0.1308	0.0193
p for trend							0.1824					0.803					0.0183
Tobacco use
Never	1155	69.5	Referent					Referent					Referent
< 1/2 PPD	161	9.7	-1.2713	0.9756	-0.1406	0.1096	0.1995	-1.6181	1.3771	-0.155	0.1339	0.2472	5.0799	4.1796	0.2165	0.1765	0.2202
1/2 - 1 PPD	219	13.2	-3.4602	2.9089	-0.3937	0.3465	0.256	-3.5905	4.1315	-0.3505	0.4176	0.4012	8.1944	4.9105	0.3473	0.2051	0.0904
1+ PPD	126	7.6	-1.117	1.1036	-0.1233	0.1235	0.3179	-0.0127	2.3398	-0.0012	0.2209	0.9958	9.7356	4.7732	0.4115	0.1983	0.038
p for trend							0.2252					0.459					0.0038
Obese (≥30 kg/m2)	1492
Alcohol use
None	771	51.7	Referent					Referent					Referent
1-4 DPW	479	32.1	-0.7408	0.681	-0.0814	0.0755	0.2813	-0.5524	1.1853	-0.0524	0.113	0.6428	7.501	3.2578	0.3183	0.1364	0.0196
5+ DPW	242	16.2	-0.5863	0.8656	-0.0643	0.0956	0.501	-0.2073	1.5094	-0.0196	0.143	0.8912	0.086	8.3066	0.0037	0.3572	0.9917
p for trend							0.9929					0.8417					0.9636
Tobacco use
Never	1004	67.3	Referent					Referent					Referent
< 1/2 PPD	149	10	1.7578	1.4308	0.1876	0.1497	0.2101	1.468	1.828	0.1368	0.1682	0.4159	-13.5421	8.9221	-0.5979	0.4046	0.1394
1/2 - 1 PPD	198	13.3	0.6188	0.9307	0.0669	0.0999	0.503	1.1688	1.6154	0.1092	0.1494	0.4651	0.7939	4.1921	0.0341	0.1798	0.8498
1+ PPD	141	9.5	0.3161	1.0916	0.0343	0.118	0.7711	1.3497	1.9133	0.1259	0.1764	0.4755	-0.1069	4.9033	-0.0046	0.211	0.9825
p for trend							0.4373					0.2977					0.8002
Interaction tests
Alcohol × BMI categories							0.098					0.743					0.0016
Tobacco × BMI categories							0.2144					0.3247					0.0524
Linear regression models of the square-root transformed mammographic density phenotypes were adjusted for: age, age2, BMI, BMI2, BMI3, late adolescent BMI, age at menarche, age at first birth, parity, menopausal status, menopausal hormone therapy use, first-degree relative with breast cancer, physical activity, and image batch. Effects were estimated separately in the Hologic and GE cohorts, and …

## Sheet: Table S6
Supplementary Table 6. Association of alcohol and tobacco use with mammographic density phenotypes among postmenopausal women, by BMI.
			Percent Density (%)		√Percent Density			Dense Area (cm2)		√Dense Area			Nondense Area (cm2)		√Nondense Area
	N	%	β	se	β	SE	p	β	se	β	SE	p	β	se	β	SE	p
Normal (18.5-24.9 kg/m2)	6647
Alcohol use
None	2054	30.9	Referent					Referent					Referent
1-4 DPW	1972	29.7	-0.6044	1.172	-0.0663	0.1295	0.6087	-1.2828	1.6735	-0.1225	0.1617	0.4487	-1.1089	1.4099	-0.0478	0.0609	0.4328
5+ DPW	2621	39.4	0.548	0.3618	0.0593	0.0389	0.1276	-0.0212	0.9849	-0.002	0.093	0.9824	-2.158	1.6742	-0.0932	0.0726	0.1989
p for trend							0.1026					0.792					0.2317
Tobacco use
Never	3899	58.7	Referent					Referent					Referent
< 1/2 PPD	1026	15.4	0.5044	0.9859	0.0546	0.1061	0.6071	1.8245	1.3229	0.1695	0.121	0.1612	2.4543	1.8907	0.1051	0.0806	0.1922
1/2 - 1 PPD	1066	16	-0.2983	0.4158	-0.0326	0.0456	0.4757	0.2878	0.5165	0.0271	0.0485	0.5761	2.2316	1.568	0.0956	0.0669	0.1528
1+ PPD	656	9.9	-0.7841	0.5019	-0.0862	0.0557	0.1216	0.4862	0.6315	0.0457	0.0591	0.44	5.2694	1.9407	0.2245	0.0819	0.0061
p for trend							0.147					0.2589					0.0212
Overweight (25-29.9 kg/m2)	5852
Alcohol use
None	2246	38.4	Referent					Referent					Referent
1-4 DPW	1790	30.6	0.1859	0.3791	0.0202	0.0411	0.6234	0.0986	0.5338	0.0093	0.0503	0.8535	-2.4668	2.1975	-0.1066	0.0954	0.2636
5+ DPW	1816	31	0.5871	0.3873	0.0635	0.0416	0.1273	0.2697	0.5429	0.0254	0.051	0.6184	-6.0653	2.3424	-0.2639	0.1031	0.0105
p for trend							0.1357					0.632					0.0047
Tobacco use
Never	3313	56.6	Referent					Referent					Referent
< 1/2 PPD	797	13.6	-0.2335	0.4694	-0.0255	0.0514	0.619	-0.0381	0.6659	-0.0036	0.0629	0.9545	2.4497	1.9211	0.1049	0.0819	0.1998
1/2 - 1 PPD	979	16.7	-1.2018	0.4244	-0.1328	0.0476	0.0053	-1.1118	0.6053	-0.106	0.0583	0.0691	4.6658	1.7829	0.199	0.0754	0.0083
1+ PPD	763	13	-0.5736	1.1448	-0.0629	0.1264	0.6186	-0.8318	0.671	-0.0791	0.0643	0.2185	2.3816	6.1302	0.102	0.2614	0.6965
p for trend							0.2074					0.0719					0.0837
Obese (≥30 kg/m2)	5024
Alcohol use
None	2767	55.1	Referent					Referent					Referent
1-4 DPW	1407	28	-0.6505	0.8488	-0.0714	0.0939	0.4468	-0.7607	0.5632	-0.0723	0.0539	0.1795	0.6564	5.1851	0.0282	0.2225	0.8992
5+ DPW	850	16.9	0.3115	0.6605	0.0338	0.0714	0.6356	0.0806	0.9474	0.0076	0.0893	0.932	-2.2502	2.0817	-0.0972	0.0903	0.2819
p for trend							0.7771					0.695					0.1413
Tobacco use
Never	2790	55.5	Referent					Referent					Referent
< 1/2 PPD	519	10.3	0.8402	0.5169	0.0906	0.0552	0.1007	1.1991	0.8449	0.112	0.0781	0.1518	-1.3774	3.3675	-0.0594	0.1456	0.6833
1/2 - 1 PPD	831	16.5	0.602	0.4247	0.0651	0.0456	0.1535	0.4905	0.6904	0.0461	0.0646	0.475	-2.9386	2.051	-0.1271	0.0892	0.1542
1+ PPD	884	17.6	-0.9594	0.9249	-0.1057	0.1031	0.3055	-1.0006	1.0029	-0.0953	0.0964	0.3226	3.4743	4.2968	0.1485	0.1825	0.4159
p for trend							0.5625					0.5506					0.6219
Interaction tests
Alcohol × BMI categories							0.6134					0.5925					0.3116
Tobacco × BMI categories							0.1219					0.1793					0.034
Linear regression models of the square-root transformed mammographic density phenotypes were adjusted for: age, age2, BMI, BMI2, BMI3, late adolescent BMI, age at menarche, age at first birth, parity, menopausal status, menopausal hormone therapy use, first-degree relative with breast cancer, physical activity, and image batch. Effects were estimated separately in the Hologic and GE cohorts, and …

## Sheet: Table S7
Supplementary Table 7. Sensitivity analyses of the association of alcohol and tobacco use with mammographic density phenotypes.
			Percent Density (%)		√Percent Density			Dense Area (cm2)		√Dense Area			Nondense Area (cm2)		√Nondense Area
	N	%	β	se	β	SE	p	β	se	β	SE	p	β	se	β	SE	p
Alcohol use
None	8843	40.2	Referent					Referent					Referent
1-4 DPW	6825	31	0.1278	0.3279	0.0139	0.0356	0.6966	-0.2937	0.4742	-0.0278	0.045	0.5368	-2.3562	0.7697	-0.1018	0.0334	0.0023
5+ DPW	6339	28.8	0.4514	0.1995	0.0489	0.0215	0.023	0.29	0.279	0.0273	0.0262	0.2958	-3.93	1.8005	-0.1703	0.0786	0.0303
p for trend							0.0169					0.2428					0.0189
Tobacco use
Never	13424	61	Referent					Referent					Referent
< 1/2 PPD	2731	12.4	-0.0633	0.2439	-0.0069	0.0266	0.7954	0.7165	0.3465	0.0672	0.0323	0.0373	2.1988	1.0148	0.0942	0.0433	0.0294
1/2 - 1 PPD	3341	15.2	-0.4884	0.2233	-0.0535	0.0246	0.0296	0.1336	0.3175	0.0126	0.0299	0.6747	2.9403	0.9987	0.1258	0.0425	0.0031
1+ PPD	2511	11.4	-0.8615	0.2509	-0.0948	0.0279	0.0007	-0.3696	0.3578	-0.035	0.034	0.3029	4.6233	1.0733	0.1972	0.0454	<0.0001
p for trend							0.0003					0.7234					<0.0001
Sensitivity analyses excluding a total of 1449 women who were diagnosed with breast cancer before the mammogram (n=1326) and/or completed the survey following the mammogram (n=133). Linear regression models of the square-root transformed mammographic density phenotypes were adjusted for: age, age2, BMI, BMI2, BMI3, late adolescent BMI, age at menarche, age at first birth, parity, menopausal statu…

## Sheet: Table S8
Supplementary Table 8. Individual and mutually adjusted models of the association of alcohol and tobacco with mammographic density phenotypes.
			Percent Density (%)		√Percent Density			Dense Area (cm2)		√Dense Area			Nondense Area (cm2)		√Nondense Area
	N	%	β	se	β	SE	p	β	se	β	SE	p	β	se	β	SE	p
Alcohol only
None	9413	40.1	Referent					Referent					Referent
1-4 DPW	7238	30.9	0.1186	0.3094	0.0129	0.0336	0.7005	-0.2189	0.4548	-0.0207	0.0431	0.6309	-1.9388	0.7478	-0.0837	0.0324	0.0099
5+ DPW	6805	29	0.3986	0.1919	0.0432	0.0207	0.0367	0.3656	0.2868	0.0344	0.0269	0.2002	-3.219	1.5894	-0.1393	0.0692	0.0441
p for trend							0.0343					0.3207					0.0323
Tobacco only
Never	14233	60.7	Referent					Referent					Referent
<½ PPD	2943	12.6	0.0367	0.2344	0.004	0.0255	0.8756	0.725	0.3326	0.068	0.031	0.0285	1.3891	0.9744	0.0596	0.0417	0.1524
½ - 1 PPD	3587	15.3	-0.4157	0.2155	-0.0455	0.0237	0.0545	0.1262	0.3058	0.0119	0.0288	0.6799	2.3558	0.9028	0.1009	0.0385	0.0087
1+ PPD	2693	11.5	-0.7183	0.2428	-0.0789	0.0269	0.0034	-0.1471	0.3466	-0.0139	0.0328	0.6702	4.1721	1.0338	0.1781	0.0438	<0.0001
p for trend							0.0017					0.9615					<0.0001
Alcohol & Tobacco
Alcohol use
None	9413	40.1	Referent					Referent					Referent
1-4 DPW	7238	30.9	0.0818	0.3367	0.0089	0.0366	0.8073	-0.3001	0.5058	-0.0284	0.048	0.5542	-1.9411	0.7501	-0.0838	0.0325	0.0098
5+ DPW	6805	29	0.4496	0.193	0.0487	0.0208	0.0195	0.2772	0.3492	0.0261	0.0328	0.425	-3.7054	1.7103	-0.1605	0.0746	0.0314
p for trend							0.0149					0.2323					0.0189
Tobacco use
Never	14233	60.7	Referent					Referent					Referent
<½ PPD	2943	12.6	-0.0165	0.2359	-0.0018	0.0257	0.9436	0.6886	0.3346	0.0646	0.0312	0.0383	1.7726	0.9781	0.076	0.0418	0.0693
½ - 1 PPD	3587	15.3	-0.4657	0.2161	-0.051	0.0238	0.0322	0.0785	0.3077	0.0074	0.029	0.7984	2.8346	1.1205	0.1213	0.0477	0.011
1+ PPD	2693	11.5	-0.7553	0.2434	-0.083	0.027	0.0021	-0.1957	0.3473	-0.0185	0.0329	0.5731	4.3657	1.0369	0.1863	0.0439	<0.0001
p for trend							0.0008					0.934					<0.0001
Linear regression models of the square-root transformed mammographic density phenotypes were adjusted for: age, age2, BMI, BMI2, BMI3, late adolescent BMI, age at menarche, age at first birth, parity, menopausal status, menopausal hormone therapy use, first-degree relative with breast cancer, physical activity, and image batch. Effects were estimated separately in the Hologic and GE cohorts, and …

## Sheet: Table S9
Supplementary Table 9. Combined effects of alcohol and tobacco use on mammographic density phenotypes.
			Percent Density (%)		√Percent Density			Dense Area (cm2)		√Dense Area			Nondense Area (cm2)		√Nondense Area
	N	%	β	se	β	SE	p	β	se	β	SE	p	β	se	β	SE	p
No tobacco, no alcohol	6092	26	Referent		Referent			Referent					Referent
No tobacco, 1-4 DPW	4675	19.9	0.0947	0.2264	0.0103	0.0246	0.677	-0.28	0.3152	-0.0265	0.0299	0.3766	-1.7125	0.9263	-0.0739	0.0401	0.0656
No tobacco, ≥5 DPW	3466	14.8	0.5964	0.2533	0.0645	0.0272	0.0177	0.5311	0.354	0.0499	0.0331	0.1316	-3.3154	1.2973	-0.1435	0.0565	0.0111
<½ PPD, no alcohol	871	3.7	-0.0064	0.4168	-0.0007	0.0454	0.9872	0.6886	0.5919	0.0646	0.0552	0.242	1.0015	1.736	0.043	0.0744	0.5633
<½ PPD, 1-4 DPW	966	4.1	0.1113	0.4005	0.0121	0.0435	0.7809	0.5269	0.5657	0.0495	0.0529	0.3499	-0.1069	1.6499	-0.0046	0.071	0.9483
<½ PPD, ≥5 DPW	1106	4.7	0.4932	0.3855	0.0534	0.0415	0.1979	1.0489	0.5438	0.0981	0.0504	0.0517	-0.6107	1.5633	-0.0263	0.0674	0.6962
½-1 PPD, no alcohol	1261	5.4	-0.5147	0.3537	-0.0564	0.039	0.1479	0.0986	0.5031	0.0093	0.0474	0.8444	5.2931	3.6401	0.2255	0.1536	0.1421
½-1 PPD, 1-4 DPW	980	4.2	-0.2381	0.3954	-0.026	0.0433	0.5487	-0.183	0.5565	-0.0173	0.0527	0.7421	0.3908	2.235	0.0168	0.096	0.8613
½-1 PPD, ≥5 DPW	1346	5.7	0	0.3508	0	0.0382	0.9999	0.4724	0.4968	0.0444	0.0465	0.3395	-1.4352	2.6268	-0.0619	0.1136	0.5855
≥1 PPD, no alcohol	1189	5.1	-0.7093	0.3638	-0.0779	0.0403	0.0531	-0.3211	0.5161	-0.0304	0.049	0.5354	4.2146	1.5415	0.1799	0.0653	0.0059
≥1 PPD, 1-4 DPW	617	2.6	0.343	0.4906	0.0372	0.053	0.4826	0.5515	1.6304	0.0518	0.1524	0.7341	2.241	2.0322	0.096	0.0867	0.268
≥1 PPD, ≥5 DPW	887	3.8	-0.9854	0.4079	-0.1086	0.0455	0.0169	-0.8526	0.5759	-0.0811	0.0552	0.1422	1.7281	1.7266	0.0741	0.0738	0.315
Interaction test
Alcohol × tobacco use							0.3115					0.1519					0.9775
Linear regression models of the square-root transformed mammographic density phenotypes were adjusted for: age, age2, BMI, BMI2, BMI3, late adolescent BMI, age at menarche, age at first birth, parity, menopausal status, menopausal hormone therapy use, first-degree relative with breast cancer, physical activity, and image batch. Effects were estimated separately in the Hologic and GE cohorts, and …
